# Supplementary material for: A large scale mass spectrometry-based histone screening for assessing epigenetic developmental toxicity
Source: Sci Rep. 2022 Jan 24;12:1256. doi: 10.1038/s41598-022-05268-x (PMC8786925; doi:10.1038/s41598-022-05268-x)
Supplement: Supplementary file 5 — Supplementary Information 5. [file 41598_2022_5268_MOESM5_ESM.xlsx]

## Sheet: Info
Flow and qPCR data
Sheets in the document
FLOW	Flow cytometry data exported from the Kaluza analysis software (Beckman Coulter Life Sciences),
qPCR	CNRQ values exported from the qbasePLUS software
Background information
FLOW	The culture system used for this experiment is the OCT4-eGFP Knock-In hESC cell line. This cell line expresses eGFP under the control of the promoter of POU5F1, one of the pluripotency markers in hESC. This allows to validate the pluripotency status of the hESCs by flow cytometry. Flow cytometry was used to determine the fraction of living and eGFP negative cells. First, a gate was set on the for…
qPCR	Pluripotent cells are characterized by several features, such as the expression of pluripotency factors (Oct4 (encoded by POU5F1), Nanog (NANOG) and Sox2 (SOX2)). Cells losing their pluripotency are differentiating in one of the germ layers (ectoderm (NES as an early marker), endoderm, mesoderm (HAND1)). Stable reference genes (B2M, RPL13A) are critical for correct interpretation of RT-qPCR data.…
Definitions/Abbreviations
FLOW
PI	Propidium iodide (PI) is a red-fluorescent cell viability dye which is excluded from living cells with intact membranes, but penetrates dead or damaged cells and binds to DNA and RNA by intercalating between the bases.
eGFP	The GFP gene is used as a reporter gene for the POU5F1 gene, i.e. eGFP is expressed under the control of the promoter of POU5F1. GFP is a green autofluorescent protein.
Total cell count	Total number of cells within the gate (ALL) set on the forward versus side scatter plot.
PI - cell count	Total number of cells within the gate set on the forward versus side scatter that are PI negative. This is the total number of living cells.
PI- gated (%)	Percentage of the cells within the gate set on the forward versus side scatter that are PI negative (living).
eGFP- cell count	Total number of cells within the PI negative gate that are eGFP negative. This is the total number of living cells that are not pluripotent anymore.
eGFP- gated (%)	Percentage of the cells within the PI negative gate that are eGFP negative.
qPCR
CNRQ	Calibrated Normalized Relative Quantity. The relative quantity of the gene expression level between different samples for a given target gene.
POU5F1	POU Class 5 Homeobox 1 is a pluripotency marker gene that encodes for OCT4 (octamer-binding transcription factor 4).
SOX2	Pluripotency marker gene that encodes for SRY-Box Transcription Factor 2.
NANOG	Pluripotency marker gene that encodes for Nanog Homeobox.
NES	Early ectoderm marker gene that encodes for Nestin.
HAND1	Mesoderm marker gene that encodes for Heart- and neural crest derivatives-expressed protein 1.
B2M	Reference gene that encodes for β-2-microglobulin.
RPL13A	Reference gene that encodes for Ribosomal protein L13A.

## Sheet: FLOW
Conc.	CAF	Total cell count	PI - cell count	PI- gated (%)	eGFP- cell count	eGFP- gated (%)	EtOH	Total cell count	PI - cell count	PI- gated (%)	eGFP- cell count	eGFP- gated (%)	NICO	Total cell count	PI - cell count	PI- gated (%)	eGFP- cell count	eGFP- gated (%)	PENG	Total cell count	PI - cell count	PI- gated (%)	eGFP- cell count	eGFP- gated (%)	MTX	Total cell count	PI - cell count	PI- gated (%)	eGFP- cell count	eGFP- gated (%)	RA	Total cell count	PI - cell count	PI- gated (%)	eGFP- cell count	eGFP- gated (%)	BIX	Total cell count	PI - cell count	PI- gated (%)	eGFP- cell count	eGFP- gated (%)	DZNep	Total cell count	PI - cell count	PI- gated (%)	eGFP- cell count	eGFP- gated (%)	TSA
1	CAF_1A	5445	4108	75.45	335.624	8.17	EtOH_0.1B	6163	5369	87.12	206	3.83684	NICO_0.002uM_A	1336	1038	77.69	163.9	15.79	PENG_5A	4656	4468	95.96	250.208	5.6	MTX_0.1A	3792	3062	80.75	558.509	18.24	RA_0.2A	3770	3265	86.6	271.648	8.32	BIX_0.01A	9310	7767	83.43	987.962	12.72	DZNep_0.01B	7943	6649	83.71	332.45	5	TSA_0.1D
1	CAF_1B	5342	4497	84.18	181.679	4.04	EtOH_0.1A	6760	5221	77.23	399	7.64221	NICO_0.002uM_B	7190	5926	82.42	370.968	6.26	PENG_5B	5293	4028	76.1	227.985	5.66	MTX_0.1B	4595	3987	86.77	521.101	13.07	RA_0.2B	7037	5933	84.31	535.75	9.03	BIX_0.01B	11343	9422	83.06	2404.49	25.52	DZNep_0.01A	3726	3081	82.69	187.017	6.07	TSA_0.1A
1	CAF_1C	8813	7594	86.17	831.543	10.95	EtOH_0.1C	7051	6425	91.12	187	2.91051	NICO_0.002uM_C	5940	4837	81.43	460.482	9.52	PENG_5C	3353	2736	81.6	121.478	4.44	MTX_0.1C	3735	3155	84.47	449.272	14.24	RA_0.2C	5475	4863	88.82	253.362	5.21	BIX_0.01C	5238	4633	88.45	511.02	11.03	DZNep_0.01C	1740	1494	85.86	81.423	5.45	TSA_0.1B
1	CAF_1D	6353	5840	91.93	348.648	5.97	EtOH_0.1D	6349	5588	88.01	333	5.9592	NICO_0.002uM_D	7884	5564	70.57	840.164	15.1	PENG_5D	7798	6385	81.88	325.635	5.1	MTX_0.1D	4018	3622	90.14	462.529	12.77	RA_0.2D	9348	8069	86.32	806.9	10	BIX_0.01D	10376	9526	91.81	1029.76	10.81	DZNep_0.01D	744	612	82.26	45.8388	7.49	TSA_0.1C
2	CAF_10A	6159	4578	74.33	440.404	9.62	EtOH_1A	8206	6678	81.38	600	8.98473	NICO_0.02uM_A	1621	1380	85.13	171.948	12.46	PENG_50A	5406	4269	78.97	260.409	6.1	MTX_1A	1915	1342	70.08	188.551	14.05	RA_2A	5139	4662	90.72	361.771	7.76	BIX_0.1A	9229	6631	71.85	510.587	7.7	DZNep_0.1A	2883	2308	80.06	138.249	5.99	TSA_1A
2	CAF_10B	5802	5120	88.25	418.304	8.17	EtOH_1B	8644	7392	85.52	299	4.04491	NICO_0.02uM_B	11222	9484	84.51	1041.34	10.98	PENG_50B	5565	3963	71.21	317.436	8.01	MTX_1B	1963	1682	85.69	149.698	8.9	RA_2B	5923	4928	83.2	294.202	5.97	BIX_0.1B	9184	7514	81.82	1367.55	18.2	DZNep_0.1B	4950	4148	83.8	416.874	10.05	TSA_1D
2	CAF_10C	7467	5969	79.94	438.125	7.34	EtOH_1C	8699	7075	81.33	404	5.71025	NICO_0.02uM_C	581	405	69.71	79.8255	19.71	PENG_50C	6097	4853	79.6	280.018	5.77	MTX_1C	1819	1440	79.16	157.968	10.97	RA_2C	3489	2973	85.21	147.163	4.95	BIX_0.1C	6926	5732	82.76	642.557	11.21	DZNep_0.1C	5729	4750	82.91	478.8	10.08	TSA_1C
2	CAF_10D	4264	3488	81.8	193.584	5.55	EtOH_1D	4222	3116	73.8	192	6.16175	NICO_0.02uM_D	5241	4515	86.15	474.978	10.52	PENG_50D	7620	6550	85.96	324.88	4.96	MTX_1D	1771	1516	85.6	253.475	16.72	RA_2D	10998	9185	83.52	1386.93	15.1	BIX_0.1D	6267	5173	82.54	662.144	12.8	DZNep_0.1D	3343	2896	86.63	198.086	6.84	TSA_1B
3	CAF_100A	5860	4816	82.18	504.717	10.48	EtOH_10A	8485	6307	74.33	455	7.21421	NICO_0.2uM_A	3079	2427	78.82	388.563	16.01	PENG_500A	5884	4351	73.95	401.597	9.23	MTX_10A	3632	2990	82.32	372.554	12.46	RA_20A	6552	5619	85.76	257.35	4.58	BIX_1A	6922	5258	75.96	503.716	9.58	DZNep_1A	5104	4389	85.99	377.454	8.6	TSA_10A
3	CAF_100B	6852	6129	89.45	698.706	11.4	EtOH_10B	8741	7823	89.5	500	6.39141	NICO_0.2uM_B	12097	11016	91.06	1258.03	11.42	PENG_500B	5917	5257	88.85	261.799	4.98	MTX_10B	2665	2227	83.56	347.857	15.62	RA_20B	6506	5211	80.1	363.207	6.97	BIX_1B	8364	6481	77.49	567.087	8.75	DZNep_1B	2196	1925	87.66	169.593	8.81	TSA_10B
3	CAF_100D	7499	6632	88.44	568.362	8.57	EtOH_10C	8796	7511	85.39	542	7.21608	NICO_0.2uM_C	3316	2272	68.52	168.128	7.4	PENG_500C	3515	2695	76.67	87.318	3.24	MTX_10C	3098	2707	87.38	250.668	9.26	RA_20C	4674	3581	76.62	153.983	4.3	BIX_1C	2752	2345	85.21	207.298	8.84	DZNep_1C	3046	2774	91.07	207.218	7.47	TSA_10C
3	CAF_100C	5090	4318	84.83	244.399	5.66	EtOH_10D	5008	4398	87.82	551	12.5284	NICO_0.2uM_D	10565	8839	83.66	1002.34	11.34	PENG_500D	6115	5026	82.19	146.257	2.91	MTX_10D	3531	3131	88.67	403.273	12.88	RA_20D	8086	6706	82.93	687.365	10.25	BIX_1D	5620	4685	83.36	770.683	16.45	DZNep_1D	2540	2236	88.03	187.6	8.39	TSA_10D
4	CAF_500A	4007	3225	80.48	261.225	8.1	EtOH_100A	9250	7542	81.54	542	7.18642	NICO_2uM_A	4618	3712	80.38	499.264	13.45	PENG_5000A	5194	4995	96.17	167.832	3.36	MTX_100A	4099	3121	76.14	289.317	9.27	RA_200A	3522	2734	77.63	131.232	4.8	BIX_10A	9091	5257	57.83	517.289	9.84	DZNep_10A	1597	1322	82.78	180.056	13.62	TSA_100A
4	CAF_500B	6603	5542	83.93	440.035	7.94	EtOH_100C	9660	8172	84.6	695	8.50465	NICO_2uM_B	9792	8754	89.4	772.103	8.82	PENG_5000B	5529	5025	90.88	168.338	3.35	MTX_100B	4653	3628	77.97	695.125	19.16	RA_200B	5104	4005	78.47	315.594	7.88	BIX_10B	7086	5866	82.78	499.197	8.51	DZNep_10B	4287	3606	84.11	653.768	18.13	TSA_100B
4	CAF_500C	5373	4666	86.84	190.839	4.09	EtOH_100B	8562	7406	86.5	724	9.77586	NICO_2uM_C	4347	3919	90.15	589.026	15.03	PENG_5000C	6409	5578	87.03	219.773	3.94	MTX_100C	3233	2805	86.76	377.553	13.46	RA_200C	6683	5811	86.95	233.602	4.02	BIX_10C	2019	1814	89.85	166.525	9.18	DZNep_10C	3020	2774	91.85	235.235	8.48	TSA_100C
4	CAF_500D	8369	6792	81.16	442.838	6.52	EtOH_100D	5887	5331	90.56	289	5.42112	NICO_2uM_D	5584	4138	74.1	206.486	4.99	PENG_5000D	7146	6706	93.84	123.39	1.84	MTX_100D	6063	5424	89.46	939.437	17.32	RA_200D	10443	9105	87.19	571.794	6.28	BIX_10D	2573	2122	82.47	206.895	9.75	DZNep_10D	3810	3381	88.74	373.939	11.06	TSA_100D
Neg	CAF_H2OA	5053	4000	79.16	440.4	11.01	EtOH_QCA	7113	6268	88.12	534	8.51946	NICO_negcontr_A	8925	7503	84.07	1309.27	17.45	PENG_H2OA	2644	2497	94.44	90.1417	3.61	MTX_DMSOA	2844	2055	72.26	410.383	19.97	RA_DMSOA	3756	3021	80.43	207.845	6.88	BIX_H2OA	5172	3706	71.66	341.693	9.22	DZNep_H2OA	6889	5937	86.18	343.159	5.78	TSA_DMSOA
Neg	CAF_H2OB	7315	6329	86.52	724.038	11.44	EtOH_QCB	8193	7310	89.22	499	6.82627	NICO_negcontr_B	5173	4193	81.06	293.51	7	PENG_H2OB	3677	3026	82.3	135.867	4.49	MTX_DMSOB	2619	2255	86.1	207.911	9.22	RA_DMSOB	2857	2492	87.22	180.421	7.24	BIX_H2OB	3543	3111	87.81	359.632	11.56	DZNep_H2OB	4090	3421	83.64	161.129	4.71	TSA_DMSOC
Neg	CAF_H20C	7786	6903	88.66	434.199	6.29	EtOH_QCC	8297	7359	88.69	556	7.55537	NICO_negcontr_C	2706	2220	82.04	332.556	14.98	PENG_H2OC	6097	5356	87.85	234.057	4.37	MTX_DMSOC	2205	2029	92.02	239.828	11.82	RA_DMSOC	5543	4637	83.66	257.353	5.55	BIX_H2OC	5770	4671	80.95	411.048	8.8	DZNep_H2OC	4251	3658	86.05	247.647	6.77	TSA_DMSOB
Neg	CAF_H20D	6504	6053	93.07	219.119	3.62	EtOH_QCD	4582	3863	84.31	325	8.41315	NICO_negcontr_D	10832	9291	85.77	1352.77	14.56	PENG_H2OD	7602	5946	78.22	285.408	4.8	MTX_DMSOD	5041	4430	87.88	667.158	15.06	RA_DMSOD	7225	6421	88.87	610.637	9.51	BIX_H2OD	13033	11126	85.37	764.356	6.87	DZNep_H2OD	3340	2698	80.78	138.947	5.15	TSA_DMSOD
[truncated: 11 more columns]

## Sheet: qPCR
CNRQ values
CAF	B2M	HAND1	NANOG	NES	POU5F1	RPL13A	SOX2	EtOH	B2M	HAND1	NANOG	NES	POU5F1	RPL13A	SOX2	NICO	B2M	HAND1	NANOG	NES	POU5F1	RPL13A	SOX2	PENG	B2M	HAND1	NANOG	NES	POU5F1	RPL13A	SOX2	MTX	B2M	HAND1	NANOG	NES	POU5F1	RPL13A	SOX2	RA	B2M	HAND1	NANOG	NES	POU5F1	RPL13A	SOX2	BIX	B2M
1B	1.023	2.067	1.107	0.8909	1.36	0.9772	3.793	0,1A	0.8029	1.146	0.8066	0.551	0.8868	1.245	0.1324	0,002B	1.805	0.2531	0.549	0.8094	0.5377	0.5541	1.586	5A	1.03	1.382	1.184	0.9682	1.173	0.9704	0.01411	0,1A	1.098	2.465	1.604	1.715	2.354	0.9107	0.6177	0,2B	0.9023	4.547	0.1923	7.421	0.2418	1.108	0.06214	0,01B	1.258
1C	0.9582	1.35	0.9213	1.124	1.155	1.044	5.128	0,1B	0.5279	0.8596	0.8919	0.7928	1.029	1.894	5.573	0,002C	1.975	0.606	0.3802	0.4747	/	0.5064	1.459	5B	0.8576	0.4769	0.6918	0.6775	1.49	1.166	0.09077	0,1B	1.329	2.983	1.954	1.64	1.905	0.7526	0.5285	0,2C	0.9309	0.4863	0.1525	11.29	0.4108	1.074	0.06967	0,01C	0.9671
1D	1.877	2.046	1.358	1.116	2.04	0.5328	1.864	0,1C	0.6613	1.982	0.9659	0.6113	0.5459	1.512	0.8546	0,002D	1.486	1.204	0.2726	0.5453	0.2038	0.6728	1.439	5C	0.659	4.382	2.845	0.6149	1.86	1.517	1.163	0,1C	1.333	2.754	1.241	0.9128	2.819	0.75	0.2341	0,2D	1.012	0.5359	0.1282	5.883	0.2343	0.9885	0.1971	0,01D	1.203
10A	1.147	5.628	1.126	1.013	1.108	0.8716	1.18	1A	0.7466	1.339	1.5	1.315	1.83	1.339	2.748	0,02B	0.8899	0.6866	0.2822	0.3622	0.2308	1.124	3.106	50A	1.082	0.03054	0.5717	1.243	0.8706	0.9244	/	1B	1.145	2.365	2.268	1.213	3	0.8736	0.8556	2B	1.069	2.085	1.122e-05	7.872	0.3407	0.9352	0.2729	0,1B	1.203
10C	1.03	1.929	0.3996	0.6477	0.6705	0.9704	6.119	1C	0.7729	0.3794	0.7605	0.4747	0.579	1.294	0.0003401	0,02C	1.566	0.4097	0.2774	0.4005	0.23	0.6388	0.9138	50B	1.067	0.9374	0.8312	0.8606	0.717	0.9374	0.1279	1D	0.8039	3.142	1.044	1.346	2.136	1.244	0.0002795	2C	0.8361	1.371	0.1964	6.028	0.2271	1.196	0.418	0,1C	3.356
10D	0.7161	1.561	0.6934	0.07322	0.4439	1.396	0.1275	1D	0.9033	1.431	0.6285	0.9794	0.6537	1.107	0.001944	0,02D	1.387	0.7887	0.4104	0.6351	0.2423	0.7211	1.439	50D	0.9783	0.791	0.6454	0.7622	0.8497	1.022	1.6	10A	0.727	5.762	1.122	0.8786	1.283	1.376	1.569	2D	0.8655	2.523	0.1408	3.977	0.1031	1.155	0.2061	0,1D	1.289
100B	11.03	15.64	9.168	0.0002299	10.8	0.09066	95.23	10A	0.699	0.5236	1.376	0.8645	1.441	1.431	0.0006152	0,2B	1.411	0.0923	0.1731	0.3511	0.1416	0.7087	2.329	500B	1.139	1.792	0.9582	0.9582	0.8207	0.8776	1.984	10B	0.7928	2.3	1.843	1.213	2.576	1.261	0.8039	20A	1.103	3.931	0.2303	6.782	0.3235	0.9065	0.1128	1B	1.084
100C	0.9482	1.163	0.09717	0.7337	0.8546	1.055	0.008871	10B	0.7756	0.4108	0.5212	0.669	0.9439	1.289	/	0,2C	1.267	0.03437	0.002283	0.2293	0.1392	0.7891	/	500C	0.781	0.492	1.067	1.192	1	1.28	1.192	10C	1.01	2.059	1.695	1.139	2.558	0.9897	0.6351	20C	1.051	4.302	0.2976	5.986	0.3467	0.9515	0.06991	1C	1.022
100D	1.045	1.326	0.5691	1.045	0.7864	0.9571	4.151	10C	/	/	/	/	/	/	/	0,2D	1.761	1.259	0.2698	0.5471	0.1456	0.5678	1.197	500D	1.427	0.772	1.341	1.143	3.784	0.7006	1.923	100A	1.227	2.102	1.358	0.8756	1.521	0.8151	0.1326	20D	1.058	2.761	0.195	7.525	0.2816	0.945	0.08607	1D	1.191
500A	0.8517	1.066	0.4736	0.2282	0.1181	1.174	0.5658	100A	1.23	0.7079	0.9559	1.4	2.044	0.8132	0.1	2B	1.533	0.4577	0.2736	0.5	0.0733	0.6522	0.4118	5000A	1.291	0.3395	1.085	0.5064	1.185	0.7747	0.8458	100B	0.7605	1.051	0.7587	1.645	1.017	1.315	4.976	200A	1.684	65.57	1.948	35.06	1.436	0.5939	1.142	10B	0.9117
500C	1.171	3.537	1.267	1.163	1.751	0.8536	1.567	100B	1.291	1.56	1.27	1.759	1.022	0.7747	4.312	2C	1.544	1.949	1.102	0.683	0.2003	0.6477	0.4796	5000A2	0.9482	0.8746	0.9954	0.9223	1.266	1.055	0.5757	100C	0.8981	0.703	1.25	1.171	1.542	1.113	2.723	200C	1.058	1.772	0.3235	10.94	0.2486	0.945	1.166	10C	115.1
500D	0.8756	1.359	0.6934	0.7466	0.9515	1.142	1.336	100C	0.5371	0.2512	0.9593	0.6113	0.6142	1.862	/	2D	1.907	0.1301	0.695	0.6134	0.4278	0.5243	0.6008	5000C	0.8878	0.3847	0.7261	0.6544	0.75	1.126	0.9851	DMSOA	0.7047	1.436	0.8899	0.6636	1.083	1.419	6.431	200D	1.228	2.297	0.1943	8.206	0.2376	0.8141	0.2477	10D	3.45
H2OB	0.9817	3.243	1.298	1.192	1.059	1.019	7.177	E8A	1.089	0.2376	0.6071	0.6417	0.3627	0.9181	0.1306	H2OB	1.666	0.3062	0.722	0.5141	0.4863	0.6001	0.5141	H2OB	0.9582	1.073	1.432	1.071	1.575	1.044	0.9582	DMSOB	1.248	0.2582	1.968	1.54	1.729	0.8011	8.112	DMSOB	0.575	3.494	0.2683	7.319	0.2875	1.739	0.7747	H2OB	0.9874
H2OC	0.9191	/	0.6886	0.894	1.027	1.088	0.4439	E8B	0.9287	5.843	2.789	4.347	2.962	1.077	1.03	H2OC	1.661	/	0.6307	0.6351	0.976	0.6022	0.6134	H2OC	1.013	1.241	1.132	1.071	1.21	0.9874	1.422	DMSOC	1.137	2.698	0.571	0.9783	0.534	0.8796	0.01917	DMSOC	2.534	3.042	0.638	10.21	0.8716	0.3946	0.3847	H2OC	0.8596
H2OD	1.108	0.3083	1.119	0.9384	0.9191	0.9023	0.3139	E8C	0.9885	0.7203	0.5905	0.3585	0.9309	1.012	7.43	H2OD	0.3614	3.266	2.196	3.063	2.107	2.767	3.171	H2OD	1.03	0.7509	0.617	0.8726	0.5249	0.9704	0.7337									DMSOD	0.6862	0.09408	5.843	0.01338	3.991	1.457	3.356	H2OD	1.178
[truncated: 30 more columns]
